# Supplementary material for: Neuropilin-2 expression is inhibited by secreted Wnt antagonists and its down-regulation is associated with reduced tumor growth and metastasis in osteosarcoma
Source: Springer Nature journal article supplement (doi:10.1186/s12943-015-0359-4), 2015-04-16

**Suppl. Fig.1**

**A**

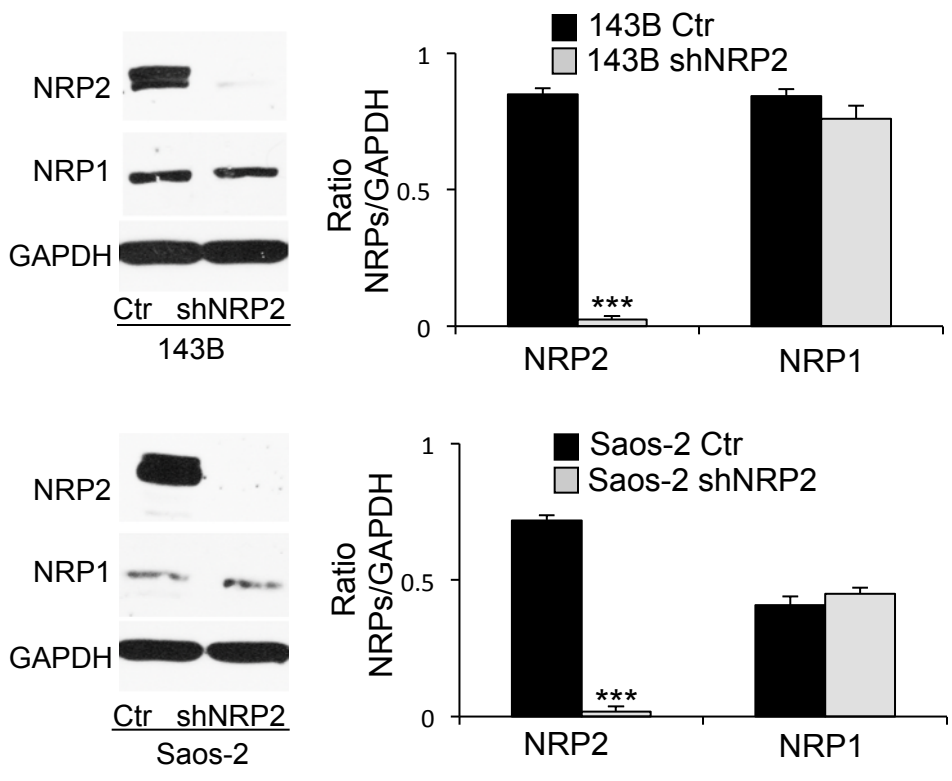

**B**

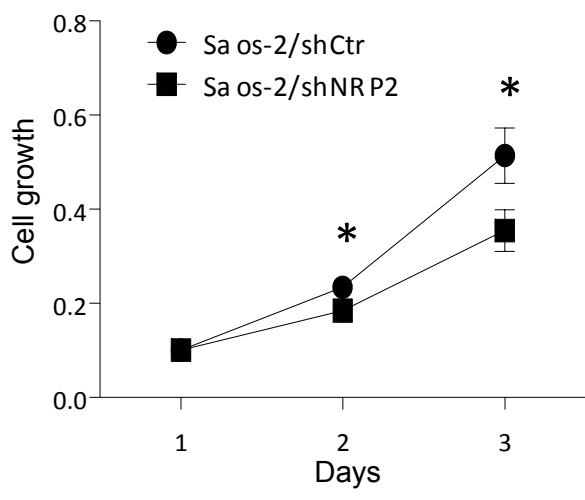

**C**

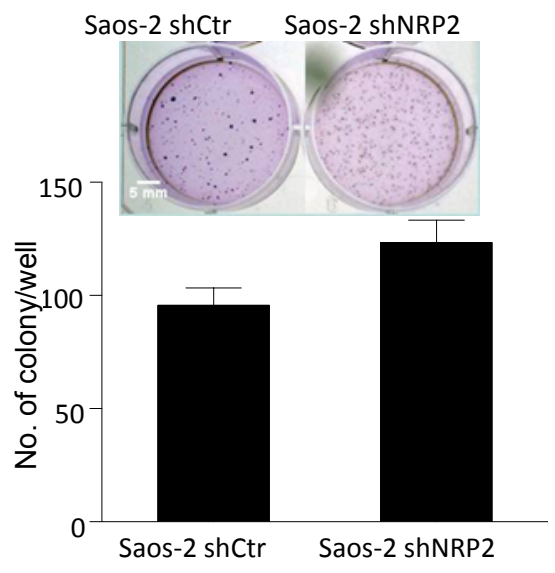

**D**

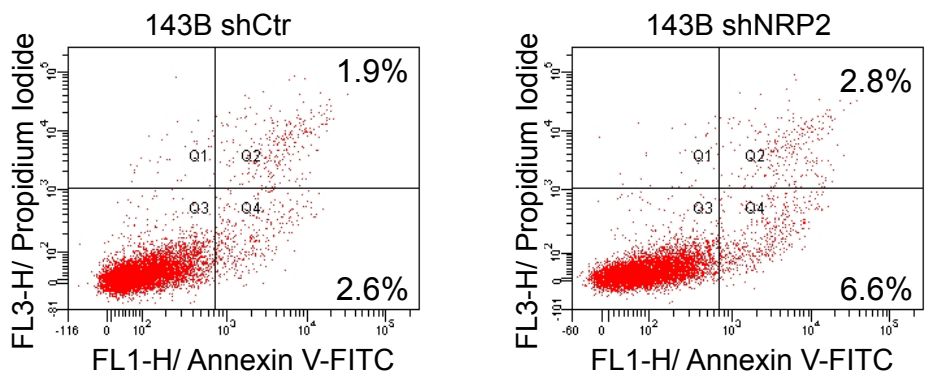

# Suppl. Fig.2

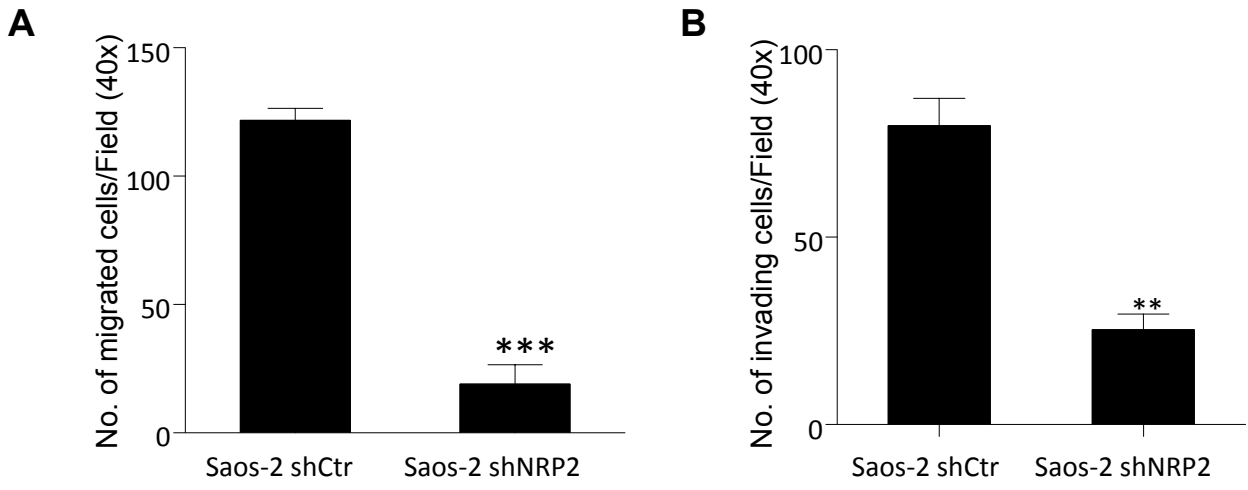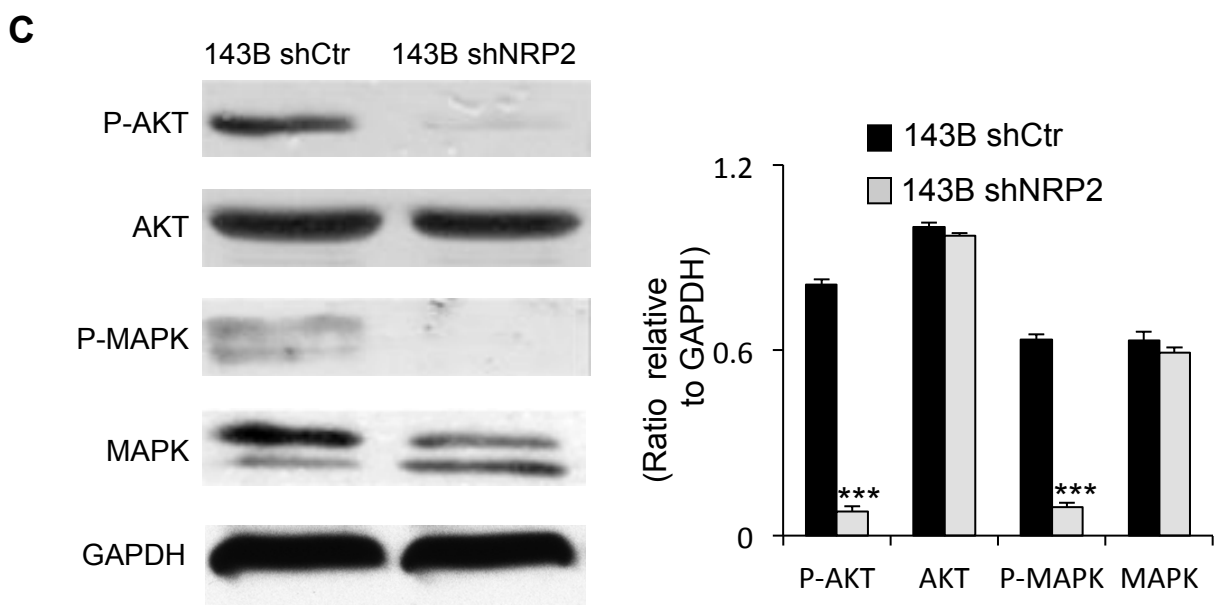

# Suppl. Fig.3

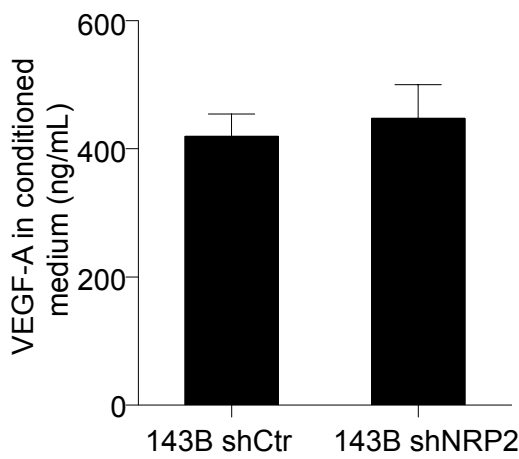

Supplement: MOESM1 [file 9763064]
